David C. Warltier, M.D., Ph.D., Editor

Anesthesiology 2006; 105:1034–46

Copyright © 2006, the American Society of Anesthesiologists, Inc. Lippincott Williams & Wilkins, Inc.

## Do Antifibrinolytics Reduce Allogeneic Blood Transfusion in Orthopedic Surgery?

Paul Zufferey, M.D.,\* Fanette Merquiol, M.D.,† Silvy Laporte, M.Sc., Ph.D.,‡ Hervé Decousus, M.D.,§ Patrick Mismetti, M.D., Ph.D.,§ Christian Auboyer, M.D.,|| Charles Marc Samama, M.D., Ph.D.,# Serge Molliex, M.D., Ph.D.||

Studies have shown that antifibrinolytic (aprotinin, tranexamic acid, or  $\epsilon$ -aminocaproic acid) reduce blood loss in orthopedic surgery. However, most lacked sufficient power to evaluate the efficacy and safety on clinical outcomes. This meta-analysis aims to evaluate whether intravenous antifibrinolytics, when compared with placebo, reduce perioperative allogeneic erythrocyte transfusion requirement in adults undergoing orthopedic surgery and whether it might increase the risk of venous thromboembolism. From MEDLINE, EMBASE, and the Cochrane Controlled Trials Register, the authors identified 43 randomized controlled trials in total hip and knee arthroplasty, spine fusion, musculoskeletal sepsis, or tumor surgery performed to July 2005 (for aprotinin, 23 trials with 1,268 participants; tranexamic acid, 20 with 1,084;  $\epsilon$ -aminocaproic acid, 4 with 171). Aprotinin and tranexamic acid reduced significantly the proportion of patients requiring allogeneic erythrocyte transfusion according to a transfusion protocol. The odds ratio was 0.43 (95% confidence interval, 0.28–0.64) for aprotinin and 0.17 (0.11–0.24) for tranexamic acid. Results suggest a dose-effect relation with tranexamic acid.  $\epsilon$ -Aminocaproic acid was not efficacious. Unfortunately, data were too limited for any conclusions regarding safety. Although the results suggest that aprotinin and tranexamic acid significantly reduce allogeneic erythrocyte transfusion, further evaluation of safety is required before recommending the use of antifibrinolytics in orthopedic surgery.

This article is accompanied by an Editorial View. Please see: Weiskopf RB: If you prick us, do we not bleed? ANESTHESIOLOGY 2006; 105:873–6.

\* Staff Physician, Department of Anesthesiology and Intensive Care and EA3065, Thrombosis Research Group, Department of Clinical Pharmacology, University Hospital of Saint-Etienne. † Assistant Professor, || Professor, Department of Anesthesiology and Intensive Care, University Hospital of Saint-Etienne. ‡ Assistant Professor, § Professor, EA3065, Thrombosis Research Group, Department of Clinical Pharmacology, University Hospital of Saint-Etienne. # Professor, Department of Anesthesiology and Intensive Care, Avicenne Hospital, Bobigny, France.

Received from the Department of Anesthesiology and Intensive Care and EA3065, Thrombosis Research Group University Hospital of Saint-Etienne, Saint-Etienne, France. Submitted for publication March 31, 2005. Accepted for publication June 16, 2006. Support was provided solely from institutional and/or departmental sources. Preliminary results of this analysis were presented at the Biennial Meeting of the International Society of Thrombosis and Haemostasis, Sydney, Australia, August 8, 2005. Dr. Samama has participated in multicenter trials for and received a restricted grant and investigational products from Bayer Pharma, Puteaux, France, to support in part the HACOL study (Hémorragies et Aprotinine en Chirurgie Orthopédique Lourde), which is included in this meta-analysis. No other conflicts of interest with respect to the conduct of this research or the contents of this article are declared.

Address correspondence to Dr. Zufferey: Department of Anesthesiology and Intensive Care, University Hospital Bellevue, 42055 Saint-Etienne cedex 02, France. paul.zufferey@chu-st-etienne.fr. Individual article reprints may be purchased through the Journal Web site, www.anesthesiology.org.

ORTHOPEDIC surgery may be associated with substantial blood loss requiring transfusion of erythrocytes. Transfusion of allogeneic erythrocytes is not free of adverse events and has been associated with transmission of infectious diseases, increased postoperative bacterial infection, immune sensitization, and transfusion-related acute lung injury.<sup>1,2</sup> Measures taken to allay concerns about the safety of blood transfusions have translated into the increasing cost of allogeneic blood units. Blood banks regularly undergo blood shortages. For these reasons, there is a need to reduce allogeneic blood transfusions. A number of effective interventions have been developed, such as preoperative autologous donation, cell salvage, or the use of erythropoietin.<sup>3–5</sup> Pharmacologic agents such as aprotinin, tranexamic acid, or  $\epsilon$ -aminocaproic acid (EACA) could reduce perioperative blood loss by interfering with fibrinolysis.<sup>6</sup> A previous meta-analysis showed that aprotinin or tranexamic acid, compared with placebo, was protective in allogeneic erythrocyte transfusion without significantly increasing the risk of adverse effects, including thromboembolic events.<sup>7</sup> However, most of the trials included in this review were performed in cardiac surgery (88% of included trials). Since the publication of this review, numerous small trials have evaluated the use of antifibrinolytics in orthopedic surgery and have shown them to be effective at reducing blood loss. Unfortunately, they were underpowered to detect efficacy on more relevant clinical outcomes. Furthermore, there remains a concern that these agents may promote a hypercoagulable state in settings of surgery at high risk of venous thromboembolism, such as orthopedic surgery.<sup>6</sup> Therefore, using the techniques of meta-analysis, we studied whether the use of intravenous antifibrinolytics in orthopedic surgery, when compared with placebo, reduces the requirement for perioperative allogeneic erythrocyte transfusion in adults and whether it might increase the risk of venous thromboembolism.

### Materials and Methods

#### Literature Search

An exhaustive literature search, both manual and computer assisted (MEDLINE, EMBASE, and Cochrane Con-

trolled Trials Register), was conducted to identify all randomized studies performed to the end of July 2005 comparing an intravenous prophylactic antifibrinolytic regimen (aprotinin, tranexamic acid, or EACA) with no treatment, placebo, or such regimen. Orthopedic surgery was defined as surgery for primary hip arthroplasty, primary knee arthroplasty, and major orthopedic procedures, which included revision or bilateral arthroplasty, spinal fusion or posterior spinal fixation, musculoskeletal sepsis, or musculoskeletal tumors. Only the key words *aprotinin*, *tranexamic acid*, and  *$\epsilon$ -aminocaproic acid* were used. All identified articles were analyzed unless it was clear from the summary that the study was not performed in an orthopedic setting. There was no restriction on the language of the article. Abstracts of meetings were searched, and reference lists in reviews, studies, and previous meta-analyses were checked. Particular attention was paid to duplicate reports; when studies were published as an abstract and an original article, only the latter was considered. When more than one article was available from a single study, an attempt was made to extract the information required from all relevant publications.

### Study Selection

From these articles, open-label and single- or double-blind randomized studies evaluating an antifibrinolytic agent were selected. Only studies with a control group, either untreated or treated with a placebo or another antifibrinolytic agent, were considered. Studies that included another method in addition to antifibrinolytic administration for reducing allogeneic blood transfusion were eligible for selection if this other method was used in both the active and control groups. To be selected, studies also had to have evaluated the efficacy and/or safety of the antifibrinolytic using at least one of the following endpoints: proportion of patients receiving at least one unit of allogeneic erythrocyte transfusion according to a transfusion protocol, proportion of patients receiving any kind of erythrocyte transfusion (*i.e.*, comprising allogeneic and/or preoperative autologous blood donation and/or cell salvage blood) according to a transfusion protocol, number of units of allogeneic blood transfused per patient according to a transfusion protocol, total volume of blood loss in milliliters (perioperative and postoperative), venous thromboembolism documented by an objective test (ultrasound, fibrinogen uptake test, or venography for deep venous thrombosis, ventilation-perfusion lung scanning, pulmonary angiography, or spiral computed tomography for pulmonary embolism), or arterial thrombosis (myocardial infarction, stroke, or limb ischemia).

To limit evaluation bias on transfusion criteria, it was considered necessary that selected studies had to have a transfusion protocol that defined at which point a transfusion of allogeneic and/or autologous erythrocytes was considered necessary. The protocol had to be identical across treatment arms within a study but could differ between studies. Trials that lacked or did not mention the use of a transfusion policy meeting these requirements were not considered for the analyses of the proportion of patients requiring erythrocyte transfusion. For example, no trials were selected where autologous blood was systematically reinfused, whatever the value of hemoglobin or the hematocrit.

Studies were excluded if they were not or were not clearly stated to have been randomized. Studies conducted in pediatric patients were also excluded. Dose-ranging studies without a control group given placebo or no treatment for comparison were excluded.

Predefined data from individual trials were initially extracted independently by two authors (F.M., P.Z.). In the event of a discrepancy with regard to either study selection or data extraction, the decision of a third author (S.M.) was final. The authors of the selected trials were contacted to confirm the accuracy of the extracted data and/or to supply missing information or clarification. When more than one active treatment group was compared with a single control group (*e.g.*, dose-ranging studies), the experimental groups were combined and then compared collectively with the control group.\*\*

### Statistical Analysis

The results from each trial were summarized on an intention-to-treat basis.

For binary outcomes such as the proportion of patients requiring allogeneic or any kind of erythrocyte transfusion or having postoperative venous thromboembolism, the meta-analyses were performed using various methods, namely, logarithm of the relative risk, logarithm of the odds ratio (OR), and rate difference. Association and heterogeneity tests were performed for each meta-analysis. A value of  $P \leq 0.05$  in an association test and a value of  $P \leq 0.10$  in a heterogeneity test were considered to be statistically significant. For each binary outcome, the method with the lowest heterogeneity is presented. In the absence of a clear explanation for heterogeneity, a random-effects model was planned. The results of these meta-analyses are presented with 95% confidence intervals. The meta-analysis was performed according to the drug (aprotinin, tranexamic acid, and EACA).

Sensitivity analyses were conducted to explore the robustness of the results. We first examined the effect of the study design by separating double-blind studies (primary analysis) from open-label studies (secondary analysis). To identify any study that may have exerted a disproportionate influence on the summary treatment effect, we deleted studies one at a time. When trials

\*\* The Cochrane Collaboration open learning material: Meta-analysis of continuous data. Available at: <http://www.cochrane-net.org/openlearning/HTML/modA1.htm>. Accessed June 24, 2006.

presented a per-protocol analysis, a sensitivity analysis imputed the missing data by choosing the worst-case scenario for treatment. We checked for publication bias using the funnel plot technique.<sup>8</sup>

In the absence of major bias suggesting that the study quality of one or a subgroup of studies may have exaggerated the treatment effect, all studies were combined. Then, exploratory analyses were performed according to the type of surgery (primary hip or knee arthroplasty *vs.* major orthopedic surgery), the type of anesthesia, the dose regimen, and the number of bolus doses (single *vs.* continuous infusion or repeated boluses).

To assess the transfusion risk with the use of antifibrinolytics according to the underlying transfusion risk, *i.e.*, how the transfusion rate in the antifibrinolytic group varies when the rate in the control group increases, an effect model analysis was performed using a weighted linear regression.<sup>9</sup> The transfusion risk was defined as the proportion of patients receiving at least one unit of allogeneic erythrocyte transfusion according to a transfusion protocol within a trial. A value of  $P < 0.05$  was considered as statistically significant when testing the slope of the linear regression.

For continuous outcomes such as number of units of allogeneic blood transfused per patient and total volume of blood loss in milliliters, the meta-analyses were performed using a random-effects model of the standardized mean difference. The mean number of units of allogeneic blood transfused per patient or total volume of blood loss of each group (treated and control group), and the corresponding SDs were collected for each trial. For each continuous outcome, standardized mean difference was calculated as the mean difference between groups divided by the common within-group SD and adjusted according to the weight of individual studies. Methods for the meta-analysis of continuous data assume that data are normally distributed. It follows that conclusions based on outcomes that are not normally distributed may be erroneous. Measures were taken to avoid this: When analyzing continuous outcomes, trials were not considered if they did not summarize normal data, *i.e.*, trials having skewed distribution with an SD larger than the mean. When median and range were reported rather than mean and SD, assumptions were made to estimate these values: The median was designated as the mean, and the SD was estimated as  $(0.95 \times \text{range})/4$ . The results of the standardized mean difference from these meta-analyses are presented with 95% confidence intervals. A value of  $P \leq 0.05$  in an association test was considered to be statistically significant.

Meta-analyses were performed using the software Comprehensive Meta Analysis (Biostat, Englewood, NJ), whereas linear regressions were calculated using the software S-PLUS 2000 (MathSoft, Seattle, WA).

## Results

### Study Selection

The literature search identified 762 studies, 63 of which remained potentially relevant after reading through titles and abstracts. Articles were excluded for several reasons: uncertainty regarding randomization (2 articles),<sup>10,11</sup> lack of a control group (3),<sup>12-14</sup> duplication (3),<sup>15-17</sup> subgroup analysis of previous study (1),<sup>18</sup> antifibrinolytic not administered intravenously (1),<sup>19</sup> conducted in pediatric patients (5).<sup>20-24</sup> All trialists were contacted; 23 confirmed the accuracy of the extracted data or supplied missing information (see acknowledgments). However, 5 studies were further withdrawn because data were not available on any outcome.<sup>25-29</sup> Therefore, 43 trials were selected for analysis: 23 with aprotinin,<sup>30-52</sup> 20 with tranexamic acid,<sup>47,53-71</sup> and 4 with EACA<sup>48,50,52,72</sup>; 4 trials studied two different antifibrinolytics compared with placebo.<sup>47,48,50,52</sup>

### Study Design

Tables 1 to 3 show the design of the studies.

**Aprotinin.** Twenty-three studies using aprotinin and comprising a total of 1,268 patients were selected.<sup>30-52</sup> Trials were small; only 2 randomized more than 100 patients. Nine involved major orthopedic surgery (revision or bilateral arthroplasty, spinal fusion or posterior spinal fixation, musculoskeletal sepsis, or musculoskeletal tumor surgery), 12 involved primary hip arthroplasty, and 2 involved knee arthroplasty. In each study, patients received a loading dose of aprotinin before surgery, which was followed by continuous infusion or repeated boluses in 17 studies. The mean total perioperative dose of aprotinin was variable but was lower than 4 million kallikrein inactivator units in all except 2 studies.<sup>49,50</sup> Fifteen studies reported the use of a transfusion protocol but did not comment on the extent to which these protocols were followed. The transfusion trigger threshold differed between trials. Prophylaxis of deep venous thrombosis, where described, varied between studies according to the country and the year of the study. Venous thrombosis screening was done by an objective test in 8 studies.<sup>31,34,35,39,45,49,50,52</sup> Type of anesthesia varied between trials. Finally, 14 of the 22 studies were double-blind, and one open study reported a proper generation of the treatment allocation sequences (random number-generated table).<sup>48</sup>

### Tranexamic Acid

Twenty studies using tranexamic acid and comprising a total of 1,084 patients were selected.<sup>47,53-71</sup> As with aprotinin, trials were small, and only one randomized more than 100 patients. Trials only involved primary hip or knee arthroplasty (10 and 11, respectively). Mean total perioperative dose of tranexamic acid was variable and ranged from 10 to 135 mg/kg. In hip arthroplasty,

**Table 1. Aprotinin versus Placebo or No Treatment: Description of Studies**

| Reference                    | Year | Type of Surgery | Aprotinin and Intravenous Dose                                                                                           | Transfusion Protocol of Erythrocyte Units       | DVT Prophylaxis | Screening of DVT | Type of Anesthesia | Double-blind | Patients Randomized |
|------------------------------|------|-----------------|--------------------------------------------------------------------------------------------------------------------------|-------------------------------------------------|-----------------|------------------|--------------------|--------------|---------------------|
| Wendt <sup>30</sup>          | 1982 | THA             | 0.02 million KIU/kg                                                                                                      | NA                                              | UFH             | Clinical         | NA                 | Yes          | 32                  |
| Haas <sup>31</sup>           | 1985 | THA             | 1.5 million KIU                                                                                                          | NA                                              | UFH-DHE         | FUT              | MA                 | NA           | 120                 |
| Janssens <sup>32</sup>       | 1994 | THA             | 2 million KIU + 0.5 million KIU/h during surgery                                                                         | Ht < 30%                                        | LMWH            | Clinical         | GA                 | Yes          | 40                  |
| Thorpe <sup>33</sup>         | 1994 | TKA             | 0.5 million KIU + 0.5 million KIU before deflation of tourniquet + 1 million KIU/h for 2 h                               | Depending on patient's condition                | UFH             | NA               | GA                 | No           | 17                  |
| Murkin <sup>34</sup>         | 1995 | Complex THA     | 2 million KIU + 0.5 million KIU/h during surgery                                                                         | Hb < 8 g/dl or blood loss > 15% of blood volume | Warfarin or UFH | Ultrasound       | GA                 | Yes          | 53                  |
| Hayes <sup>35</sup>          | 1996 | THA             | 2 million KIU                                                                                                            | Blood loss > maximum tolerated blood loss       | LMWH            | Venography       | RA                 | Yes          | 40                  |
| Llao <sup>36</sup>           | 1996 | Spine           | 2 million KIU + 2 bolus of 0.5 million KIU                                                                               | NA                                              | NA              | NA               | GA                 | Yes          | 20                  |
| Compostella <sup>37</sup>    | 1997 | THA             | 2 million KIU + 0.5 million KIU/h during surgery                                                                         | Ht < 27%                                        | NA              | NA               | RA                 | NA           | 100                 |
| Utada <sup>38</sup>          | 1997 | THA             | 2 million KIU                                                                                                            | NA                                              | NA              | NA               | RA and GA          | NA           | 21                  |
| Capdevila <sup>39</sup>      | 1998 | MOS             | 1 million KIU + 0.5 million KIU/h during surgery                                                                         | Ht < 25%                                        | Intravenous UFH | Ultrasound       | GA                 | Yes          | 23                  |
| Garcia-Enguita <sup>40</sup> | 1998 | Complex THA     | 2 million KIU + 0.5 million KIU/h during surgery                                                                         | Defined prospectively                           | NA              | NA               | RA                 | NA           | 30                  |
| Llao <sup>41</sup>           | 1998 | THA             | 2 million KIU                                                                                                            | Hb < 9 g/dl                                     | LMWH            | Clinical         | GA                 | NA           | 20                  |
| D'Ambrosio <sup>42</sup>     | 1999 | THA             | 0.5 million KIU + 0.5 million KIU/h during surgery                                                                       | CS systematically reinfused                     | LMWH            | Clinical         | RA or GA           | Yes          | 60                  |
| Lentschener <sup>43</sup>    | 1999 | Spine           | 2 million KIU + 0.5 million KIU/h during surgery                                                                         | Ht < 26%                                        | LMWH            | Clinical         | GA                 | Yes          | 72                  |
| Langdown <sup>44</sup>       | 2000 | THA             | 1.5 million KIU                                                                                                          | NA                                              | NA              | NA               | RA                 | Yes          | 60                  |
| Murkin <sup>45</sup>         | 2000 | THA             | 0.5 million KIU or 1 million KIU + 0.25 million KIU/h during surgery or 2 million KIU + 0.5 million KIU/h during surgery | Ht < 18%                                        | Warfarin        | Ultrasound       | RA or GA           | Yes          | 301                 |
| Cvachovec <sup>46</sup>      | 2001 | THA             | 1 million KIU + 1 million KIU during 1 h                                                                                 | Hb < 9-10 g/dl                                  | LMWH            | Clinical         | RA or GA           | No           | 42                  |
| Engel <sup>47</sup>          | 2001 | TKA             | 1 million KIU before deflation of tourniquet + 0.5 million KIU/h for 4 h                                                 | Hb < 10 g/dl                                    | LMWH            | Clinical         | RA                 | No           | 24                  |
| Urban <sup>48</sup>          | 2001 | Spine           | 1 million KIU + 0.25 million KIU/h during surgery                                                                        | Hb < 8 g/dl or Ht < 25%                         | NA              | Clinical         | GA                 | No           | 40                  |
| Samama <sup>49</sup>         | 2002 | MOS             | 4 million KIU + 1 million KIU/h during surgery or 2 million KIU + 0.5 million KIU/h during surgery                       | Ht < 24%                                        | LMWH            | Venography       | GA                 | Yes          | 58                  |
| Amar <sup>50</sup>           | 2003 | Cancer          | 2 million KIU + 0.5 million KIU/h during surgery                                                                         | Hb < 8 g/dl or Ht < 24%                         | IPC             | Ultrasound       | GA                 | Yes          | 47                  |
| Jeserschek <sup>51</sup>     | 2003 | MOS             | 1 million KIU + 0.5 million KIU/h during surgery                                                                         | Ht < 25-30%                                     | LMWH            | Clinical         | NA                 | Yes          | 18                  |
| Ray <sup>52</sup>            | 2005 | THA             | 2 million KIU + 0.5 million KIU/h for 3 h                                                                                | Depending on patient's condition                | FPC + aspirin   | Ultrasound       | GA                 | Yes          | 30                  |

First dose of aprotinin was started before surgery, otherwise stated. Trials that systematically reinfused autologous blood, whatever the value of hemoglobin (Hb) or hematocrit (Ht) was, were not considered to have used a transfusion protocol.

Complex THA = revision or bilateral primary total hip arthroplasty; CS = cell salvage blood; DHE = dihydroergotamine; Double-blind = patients and investigators were blinded to treatment allocation; DVT = deep vein thrombosis; FPC = foot pump compression; FUT = fibrinogen uptake test; GA = general anesthesia; IPC = intermittent pneumatic compression; KIU = kallikrein inactivator units; LMWH = low-molecular-weight heparin; MOS = major orthopedic surgery such as revision arthroplasty, musculoskeletal sepsis, or tumors; NA = data not available; RA = regional anesthesia; Spine = spine fusion or posterior spinal fixation surgery; THA = total hip arthroplasty; TKA = total knee arthroplasty; UFH = unfractionated heparin.



**Table 2. Tranexamic Acid versus Placebo or No Treatment: Description of Studies**

| Reference               | Year | Type of Surgery | Tranexamic Acid and Intravenous Dose                                                                                                                           | Transfusion Protocol of Erythrocyte Units   | DVT Prophylaxis | Screening of DVT         | Type of Anesthesia | Double-blind | Patients Randomized |
|-------------------------|------|-----------------|----------------------------------------------------------------------------------------------------------------------------------------------------------------|---------------------------------------------|-----------------|--------------------------|--------------------|--------------|---------------------|
| Hiippala <sup>53</sup>  | 1995 | TKA             | 15 mg/kg                                                                                                                                                       | Hb < 10 g/dl                                | LMWH            | Clinical                 | RA                 | Yes          | 29                  |
| Benoni <sup>54</sup>    | 1996 | TKA             | 10 mg/kg + 10 mg/kg 3 h after                                                                                                                                  | Hb < 8.5–10 g/dl                            | LMWH            | Clinical                 | RA                 | Yes          | 86                  |
| Hiippala <sup>55</sup>  | 1997 | TKA             | 15 mg/kg + 10 mg/kg 3 and 6 h after                                                                                                                            | Hb < 10 g/dl                                | LMWH            | Clinical                 | RA                 | Yes          | 77                  |
| Duquenne <sup>56</sup>  | 1999 | THA             | 15 mg/kg                                                                                                                                                       | PAD systematically reinfused                | NA              | Ultrasound               | GA                 | Yes          | 70                  |
| Jansen <sup>57</sup>    | 1999 | TKA             | 15 mg/kg + 15 mg/kg every 8 h for 3 days                                                                                                                       | Ht < 26%                                    | LMWH            | Clinical                 | GA                 | Yes          | 42                  |
| Benoni <sup>58</sup>    | 2000 | THA             | 10 mg/kg end of surgery + 10 mg/kg 3 h after                                                                                                                   | Hb < 8.5–10 g/dl                            | LMWH            | Clinical                 | RA or GA           | Yes          | 40                  |
| Ekbäck <sup>59</sup>    | 2000 | THA             | 10 mg/kg + 1 mg · kg <sup>-1</sup> · h <sup>-1</sup> during surgery + 10 mg/kg 3 h after                                                                       | PAD systematically reinfused                | IPC             | Ultrasound               | RA                 | Yes          | 40                  |
| Ido <sup>60</sup>       | 2000 | THA/TKA         | 1,000 mg + 1,000 mg 3 h after surgery                                                                                                                          | NA                                          | NA              | Clinical                 | NA                 | No           | 83                  |
| Benoni <sup>61</sup>    | 2001 | THA             | 10 mg/kg                                                                                                                                                       | Hb < 8.5–10 g/dl                            | LMWH            | Clinical                 | RA or GA           | Yes          | 40                  |
| Ellis <sup>62</sup>     | 2001 | TKA             | 15 mg/kg + 10 mg · kg <sup>-1</sup> · h <sup>-1</sup> for 12 h                                                                                                 | Ht < 27%                                    | LMWH            | NA                       | GA                 | No           | 20                  |
| Engel <sup>47</sup>     | 2001 | TKA             | 15 mg/kg + 10 mg/kg 3 h after                                                                                                                                  | Hb < 10 g/dl                                | LMWH            | Clinical                 | RA                 | No           | 24                  |
| Tanaka <sup>63</sup>    | 2001 | TKA             | 20 mg/kg before surgery or 20 mg/kg before deflation of tourniquet or 10 mg/kg before surgery + 10 mg/kg before deflation of tourniquet                        | Hb < 7–10 g/dl                              | NA              | Radioisotope venography  | NA                 | Yes          | 99                  |
| Veien <sup>64</sup>     | 2002 | TKA             | 10 mg/kg + 10 mg/kg 3 h after                                                                                                                                  | Ht < 28%                                    | LMWH            | Clinical                 | RA                 | No           | 30                  |
| Good <sup>65</sup>      | 2003 | TKA             | 10 mg/kg + 10 mg/kg 3 h after                                                                                                                                  | Hb < 9 g/dl                                 | LMWH            | Clinical                 | RA                 | Yes          | 55                  |
| Husted <sup>66</sup>    | 2003 | THA             | 10 mg/kg + 1 mg · kg <sup>-1</sup> · h <sup>-1</sup> for 10 h                                                                                                  | Reduction in Hb > 25% and clinical symptoms | LMWH            | Clinical                 | RA                 | Yes          | 40                  |
| Yamasaki <sup>67</sup>  | 2003 | THA             | 1,000 mg                                                                                                                                                       | PAD systematically reinfused                | None            | Clinical                 | RA                 | No           | 40                  |
| Garneti <sup>68</sup>   | 2004 | THA             | 10 mg/kg                                                                                                                                                       | None                                        | IPC             | Ultrasound or venography | RA                 | Yes          | 50                  |
| Lemay <sup>69</sup>     | 2004 | THA             | 10 mg/kg + 10 mg · kg <sup>-1</sup> · h <sup>-1</sup> during surgery                                                                                           | Hb < 7 g/dl                                 | LMWH            | Ultrasound               | RA                 | Yes          | 40                  |
| Zohar <sup>70</sup>     | 2004 | TKA             | 15 mg/kg + 10 mg · kg <sup>-1</sup> · h <sup>-1</sup> for 12 h or 15 mg/kg + 10 mg · kg <sup>-1</sup> · h <sup>-1</sup> for 2 h + 1 g oral TA 6 and 12 h after | Ht < 28%                                    | LMWH            | Ultrasound               | GA                 | No           | 60                  |
| Johansson <sup>71</sup> | 2005 | THA             | 15 mg/kg                                                                                                                                                       | Hb < 9 g/dl                                 | LMWH            | Clinical                 | RA                 | Yes          | 119                 |

First dose of tranexamic acid was started before surgery in total hip arthroplasty (THA) and before deflation of tourniquet in total knee arthroplasty (TKA), otherwise stated. Trials that systematically reinfused autologous blood, whatever the value of hemoglobin (Hb) or hematocrit (Ht) was, were not considered to have used a transfusion protocol.

Double-blind = patients and investigators were blinded to treatment allocation; DVT = deep vein thrombosis; GA = general anesthesia; IPC = intermittent pneumatic compression; LMWH = low-molecular-weight heparin; NA = data not available; PAD = preoperative autologous blood donation; RA = regional anesthesia.

treatment was started preoperatively except in one study in which it was initiated at the end of surgery.<sup>58</sup> In knee arthroplasty, tranexamic acid was initiated before tourniquet deflation except in two treatment arms of one study in which the drug was started preoperatively.<sup>63</sup> The loading dose was followed by a continuous

infusion or repeated boluses in 14 studies; in most cases, the second bolus was 3 h later. The transfusion trigger threshold varied between trials and was reported in 15 of them. As with aprotinin, the authors did not comment on the extent to which the transfusion protocols were followed. Short-term prophylaxis of deep venous throm-

**Table 3.  $\epsilon$ -Aminocaproic Acid *versus* Placebo or No Treatment: Description of Studies**

| Reference            | Year | Type of Surgery | EACA and Intravenous Dose                                             | Transfusion Protocol of Erythrocyte Units | DVT Prophylaxis                 | Screening of DVT | Type of Anesthesia | Double-blind | Patients Randomized |
|----------------------|------|-----------------|-----------------------------------------------------------------------|-------------------------------------------|---------------------------------|------------------|--------------------|--------------|---------------------|
| Urban <sup>48</sup>  | 2001 | Spine           | 5 g + 15 mg · kg <sup>-1</sup> · h <sup>-1</sup> during surgery       | Hb < 8 g/dl or Ht < 25%                   | NA                              | Clinical         | GA                 | No           | 40                  |
| Harley <sup>72</sup> | 2002 | THA             | 150 mg/kg + 12.5 mg · kg <sup>-1</sup> · h <sup>-1</sup> for 5 h      | Hb < 8 g/dl or Ht < 24%                   | UFH until INR > 2 with warfarin | Clinical         | RA and/or GA       | Yes          | 55                  |
| Amar <sup>50</sup>   | 2003 | Cancer          | 150 mg/kg + 15 mg · kg <sup>-1</sup> · h <sup>-1</sup> during surgery | Hb < 8 g/dl or Ht < 24%                   | IPC                             | Ultrasound       | GA                 | Yes          | 46                  |
| Ray <sup>52</sup>    | 2005 | THA             | 10 g + 5 g over 3 h                                                   | Depending on patient's condition          | FPC + aspirin                   | Ultrasound       | GA                 | Yes          | 30                  |

First dose of  $\epsilon$ -aminocaproic acid (EACA) was started before surgery.

Double-blind: patients and investigators were blinded to treatment allocation; DVT = deep vein thrombosis; FPC = foot pump compression; GA = general anesthesia; Hb = hemoglobin; Ht = hematocrit; INR = international normalized ratio; IPC = intermittent pneumatic compression; LMWH = low-molecular-weight heparin; NA = data not available; RA = regional anesthesia; THA = total hip arthroplasty; UFH = unfractionated heparin.

bosis with low-molecular-weight heparin was the most common form of prophylaxis. Venous thrombosis screening was done by an objective test in 6 studies.<sup>56,59,63,68,69,70</sup> The majority of trials were performed in Scandinavia; therefore, regional anesthesia (epidural or spinal anesthesia) was favored over general anesthesia. Finally, 14 of the 20 studies were double-blind, 3 open studies reported a proper generation of the treatment allocation sequences (computer-generated randomization table),<sup>62,64,70</sup> and 3 open studies reported a proper concealment of the treatment allocation.<sup>62,64,67</sup>

#### *$\epsilon$ -Aminocaproic Acid*

There were only four selected studies using EACA, comprising a total of 171 patients.<sup>48,50,52,72</sup> Two involved hip arthroplasty, and two involved major orthopedic surgery. All studies used a single bolus before surgery followed by a continuous infusion. Transfusion of erythrocytes was predefined by a transfusion protocol in three studies. In one study, the regimen of deep venous prophylaxis was unavailable. Venous thrombosis screening was done by an objective test in two studies.<sup>50,52</sup> Three studies were double-blind, and the open study reported a proper generation of the treatment allocation sequences (random number-generated table).<sup>48</sup>

#### *Results Regarding Requirement for Transfusion of Allogeneic Erythrocytes*

Lack of a transfusion protocol, as defined in the Materials and Methods section, was the reason for excluding eight studies from the evaluation of this criterion (three with aprotinin,<sup>33,42,52</sup> four with tranexamic acid,<sup>56,59,67,68</sup> and one with EACA<sup>52</sup>). The other reason was nonavailable data of this criterion (five trials with aprotinin<sup>32,35,37,40,48</sup>) and nonavailable data on the use of a transfusion protocol (five with aprotinin<sup>30,31,36,38,44</sup> and one with tranexamic acid<sup>60</sup>).

We used the logarithm of the OR instead of the logarithm of the relative risk or the rate difference because it was the more conservative method. Treatment with aprotinin and tranexamic acid led to a significant reduction in the proportion of patients requiring at least one unit of allogeneic erythrocyte transfusion according to a transfusion protocol. Results were significant in double-blind studies for aprotinin (OR, 0.42 [95% confidence interval, 0.27–0.66];  $P < 0.01$ ) and for tranexamic acid (OR, 0.18 [0.12–0.28];  $P < 0.01$ ) (fig. 1). EACA did not lead to a significant reduction in the proportion of patients requiring allogeneic erythrocyte transfusion: The OR was 0.71 (0.29–1.73;  $P = 0.45$ ; fig. 1).

Sensitivity analyses were not suggestive of major bias. Similar estimates of treatment effect for aprotinin and tranexamic acid were achieved in open-label studies: Heterogeneity test between open and double-blind subgroups was  $P = 0.92$  for aprotinin and  $P = 0.22$  for tranexamic acid (fig. 1). Deletion of individual studies one at a time did not significantly alter the primary outcome. After contacting the authors, data of excluded patients were unavailable in three per-protocol studies.<sup>65,69,72</sup> Imputing these missing data by choosing the worst-case scenario for treatment did not modify the direction or magnitude of treatment effect. Funnel plots for each drug did not suggest that low-quality studies (open-label studies) and/or publication bias (absence of studies showing no significant beneficial effect) exaggerated the magnitude of the estimated treatment effect (fig. 2).

Because these sensitivity analyses did not suggest major bias due to study quality, open-label and double-blind studies were pooled. The pooled estimate revealed a statistically significant reduction in allogeneic erythrocyte transfusion for aprotinin compared with placebo (OR, 0.43 [0.28–0.64];  $P < 0.01$ ) and for tranexamic acid compared with placebo (OR, 0.17 [0.11–0.24];  $P < 0.01$ ; fig. 1).

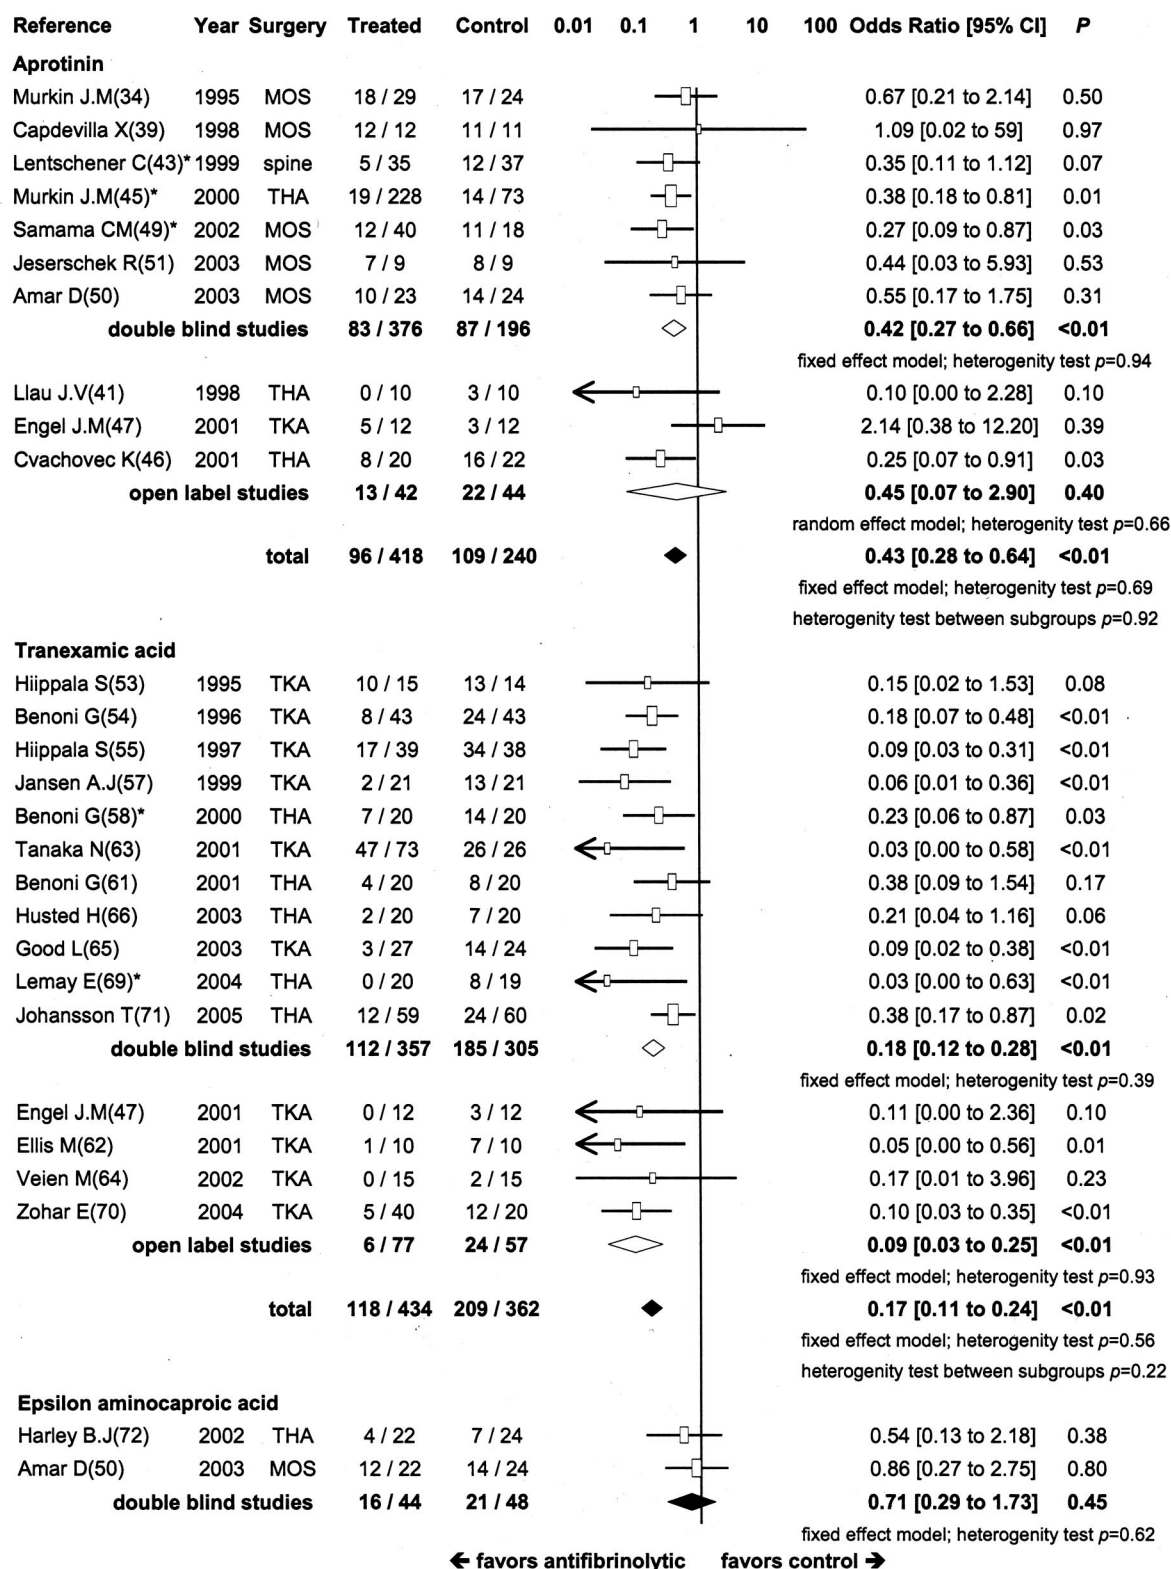

Fig. 1. Meta-analysis of use of antifibrinolytic compared with placebo or no treatment on the proportion of patients requiring allogeneic erythrocyte transfusion according to a transfusion protocol. The odds ratio for the individual studies is represented as a square within a bar representing the 95% confidence interval (CI). Symbol size is proportional to the study weight. The odds ratio for summaries is represented as a diamond. The width of the diamonds corresponds to the 95% CI. An odds ratio less than 1 indicates that the antifibrinolytic is more effective than placebo. If the value of 1 is included within the 95% CI, the result is not significant ( $P > 0.05$ ). MOS = major orthopedic surgery; spine = spine fusion or posterior spinal fixation surgery; THA = total hip arthroplasty; TKA = total knee arthroplasty. \* Trials used autologous blood before allogeneic blood when possible and according to a transfusion protocol. Data shown are allogeneic erythrocyte transfusion.

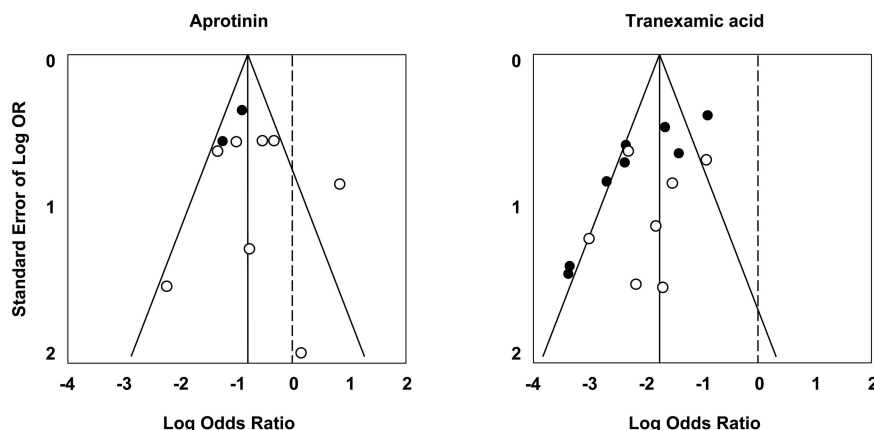

Fig. 2. Funnel plot of use of antifibrinolytic compared with placebo or no treatment on the proportion of patients requiring allogeneic erythrocyte transfusion according to a transfusion protocol. A funnel plot is a scatter plot of the treatment effect estimated from individual studies (logarithm of odds ratio [OR], horizontal axis) against a measure of study size (SE of logarithm of OR, vertical axis). Solid line is pooled OR; dashed line is null effect. Effect estimates from small studies should scatter more widely at the bottom of the graph, with the spread narrowing among larger studies. In the absence of bias, studies are symmetrically distributed around the pooled OR, and the plot resembles a symmetric inverted funnel. Asymmetric funnel plots may indicate publication bias or be due to exaggeration of treatment effects in small studies of low quality. Solid circles are double-blind studies; open circles are open-label studies and/or studies showing no significant beneficial effect.

Exploratory analyses did not find any influence of the type of anesthesia, the type of surgery, or the dose regimen for aprotinin. For example, the OR for aprotinin compared with placebo was 0.41 (0.22–0.74) in primary hip or knee arthroplasty and 0.44 (0.25–0.77) in major orthopedic surgery (heterogeneity test between subgroups;  $P = 0.85$ ; fig. 3). Exploratory analyses did not suggest that the type of anesthesia modified the results for tranexamic acid. Trials with this latter drug were only performed in primary hip or knee arthroplasty. Although the results were not qualitatively influenced by the type of surgery, in quantitative terms, the results support a higher efficacy in knee arthroplasty for tranexamic acid compared with placebo (knee arthroplasty OR, 0.11 [0.06–0.18] *vs.* hip arthroplasty OR, 0.29 [0.17–0.52]; heterogeneity tests between subgroups  $P < 0.01$ ; fig. 3). Furthermore, the efficacy of tranexamic acid in terms of requirement for transfusion of allogeneic erythrocytes seems to be modified by the regimen used. First, the efficacy *versus* placebo was greater with a dose regimen of more than 30 mg/kg tranexamic acid (OR, 0.08 [0.04–0.17]) than with a lower dose regimen (OR, 0.21 [0.14–0.33]; fig. 3). The heterogeneity test between these two dose regimens is significant ( $P = 0.03$ ). Second, the results seem to favor the use of more than one single bolus dose of tranexamic acid (single bolus *vs.* placebo: OR, 0.32 [0.17–0.63]; bolus followed by continuous infusion or repeated bolus *vs.* placebo: OR, 0.12 [0.07–0.19]; heterogeneity tests between subgroups,  $P = 0.01$ ; fig. 3).

The efficacy of aprotinin and tranexamic acid were also evaluated using a regression model. The linear regression revealed a significant correlation between the event rates (defined as the proportion of patients requiring allogeneic erythrocyte transfusion according to a

transfusion protocol) in the active and control groups observed in the studies. This relation was evident not only for aprotinin ( $R^2 = 0.83$ , test of slope;  $P < 0.01$ ), but also for tranexamic acid ( $R^2 = 0.75$ , test of slope;  $P < 0.01$ ; fig. 4).

#### Other Efficacy Endpoints

Aprotinin and tranexamic acid led to a significant decrease in the proportion of patients requiring any kind of erythrocyte transfusion (*i.e.*, comprising allogeneic and/or preoperative autologous blood donation and/or cell salvage blood) according to a transfusion protocol (OR, 0.49 [0.33–0.73],  $P < 0.01$  for aprotinin; 0.17 [0.12–0.25],  $P < 0.01$  for tranexamic acid). The total perioperative blood loss was also significantly reduced with the use of aprotinin and tranexamic acid (standardized mean difference: 0.79 [0.64–0.94],  $P < 0.01$  for aprotinin; 1.06 [0.68–1.43],  $P < 0.01$  for tranexamic acid). EACA did not lead to a significant reduction in the

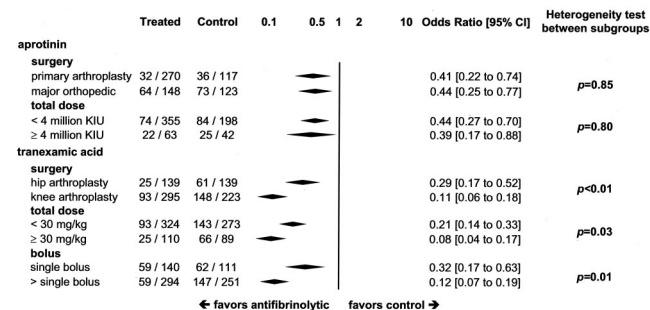

Fig. 3. Exploratory analyses of efficacy of aprotinin or tranexamic acid on allogeneic erythrocyte transfusion. The odds ratio for summaries is represented as a diamond. The width of the diamonds corresponds to the 95% confidence interval (CI). An odds ratio less than 1 indicates that the antifibrinolytic is more effective than placebo. If the value of 1 is included within the 95% CI, the result is not significant ( $P > 0.05$ ).



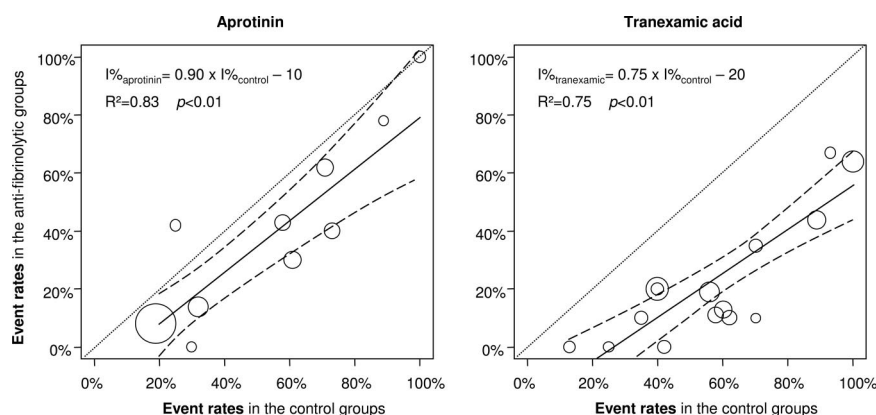

Fig. 4. Linear regression analysis of the transfusion rate with the use of aprotinin or tranexamic acid according to the underlying transfusion rate. All studies included in the meta-analysis are represented by a circle. The size of each circle is proportional to the size of the trials. Event rates: proportion of patients transfused with allogeneic erythrocyte according to a transfusion protocol. The solid lines are calculated linear regressions weighted by the number of patients included in each study. The dashed lines are 95% confidence intervals of the regression lines.  $R^2$  is the coefficient of linear correlation;  $P$  is the probability that the slope of regression differs significantly from zero. The dotted lines represent equivalence. Studies below these dotted lines are in favor of the efficacy of the antifibrinolytic.

proportion of patients requiring any kind of erythrocyte transfusion (OR, 0.71 [0.29–1.73],  $P = 0.45$ ) or in total blood loss (standardized mean difference: 0.38 [–0.39 to 1.16],  $P = 0.33$ ).

Analysis for the outcome “number of units of allogeneic blood transfused per patient” was not performed for any drug because almost no trials summarized normal data.

#### Venous Thromboembolism

This meta-analysis did not show a statistically significant increase risk of venous thromboembolism for anti-fibrinolytics. In double-blind randomized trials that screened systematically for deep venous thrombosis using an objective test at the end of the study period or earlier if clinically suspected, adjusted pooled incidence of venous thromboembolism was 8.6% *versus* 12% for aprotinin compared with placebo, 20.8% *versus* 20.9% for tranexamic acid compared with placebo, and 8.1% *versus* 10.3% for EACA compared with placebo. The OR was 0.67 (0.36–1.27;  $P = 0.22$ ) for aprotinin, 1.08 (0.49–2.39;  $P = 0.84$ ) for tranexamic acid, and 0.82 (0.18–3.67;  $P = 0.79$ ) for EACA (fig. 5). Similar estimates of treatment effect for antifibrinolytics were achieved in open-label studies and/or studies that only screened for symptomatic venous thrombosis: Heterogeneity test between open and double-blind subgroups was  $P = 0.59$  for aprotinin,  $P = 0.61$  for tranexamic acid, and  $P = 0.87$  for EACA (fig. 5). Therefore, all studies were pooled, and the estimate of treatment effect did not reveal a statistically significant increase in venous thrombosis for each antifibrinolytic compared with placebo (fig. 5).

#### Other Safety Endpoints

Analysis for other adverse events that may be related to the use of antifibrinolytics was not performed because these events were seldom reported. Seven hundred twenty-three patients received aprotinin, and there was 1 case of non-ST-elevation myocardial infarction<sup>54</sup> and 1 case of lower limb ischemia<sup>35</sup>; 1 patient died of septic

shock, rhabdomyolysis, and acute kidney failure<sup>47</sup>; and 2 had a nonfatal anaphylactic reaction.<sup>51,52</sup> With tranexamic acid (575 patients), there was 1 case of myocardial infarction.<sup>55</sup> One patient with EACA (76 patients) reported a rash postoperatively,<sup>74</sup> and 3 reported a non-ST-elevation myocardial infarction.<sup>54</sup> Finally, in the placebo-treated patients (1,057 patients), 1 had a postoperative cerebral vascular accident,<sup>36</sup> and another had a myocardial infarction.<sup>47</sup>

#### Discussion

Meta-analysis is a retrospective examination that is subject to the quality of the data of the included studies. To minimize the possibility of bias, for an accurate estimate of efficacy, we chose to perform a primary analysis by including only double-blind randomized trials. Results showed that the use of either aprotinin or tranexamic acid in orthopedic surgery significantly reduced the proportion of patients requiring erythrocyte transfusion according to a transfusion protocol (as has been previously shown in cardiac surgery or orthotopic liver transplantation).<sup>7,73,74</sup> With EACA, we did not find any significant reduction of hemorrhagic risk, probably due to the small number of trials included (2 trials with 101 participants).

Besides, to perform an exhaustive review of the use of antifibrinolytics in orthopedic surgery and to increase the power of the analysis, we extended our selection to open trials. To reduce bias we chose for our primary outcome not to consider trials that did not use or did not mention the use of a transfusion policy. Unfortunately, because none of the trials included comment on the extent to which the transfusion protocols were followed, this could be a source of bias in open-label studies. Therefore, we explored the robustness of our findings through sensitivity analyses.<sup>75</sup> Because these analyses did not suggest that the open-label trials or any individual trial exaggerated the magnitude of the estimated treatment effect of aprotinin or tranexamic acid,

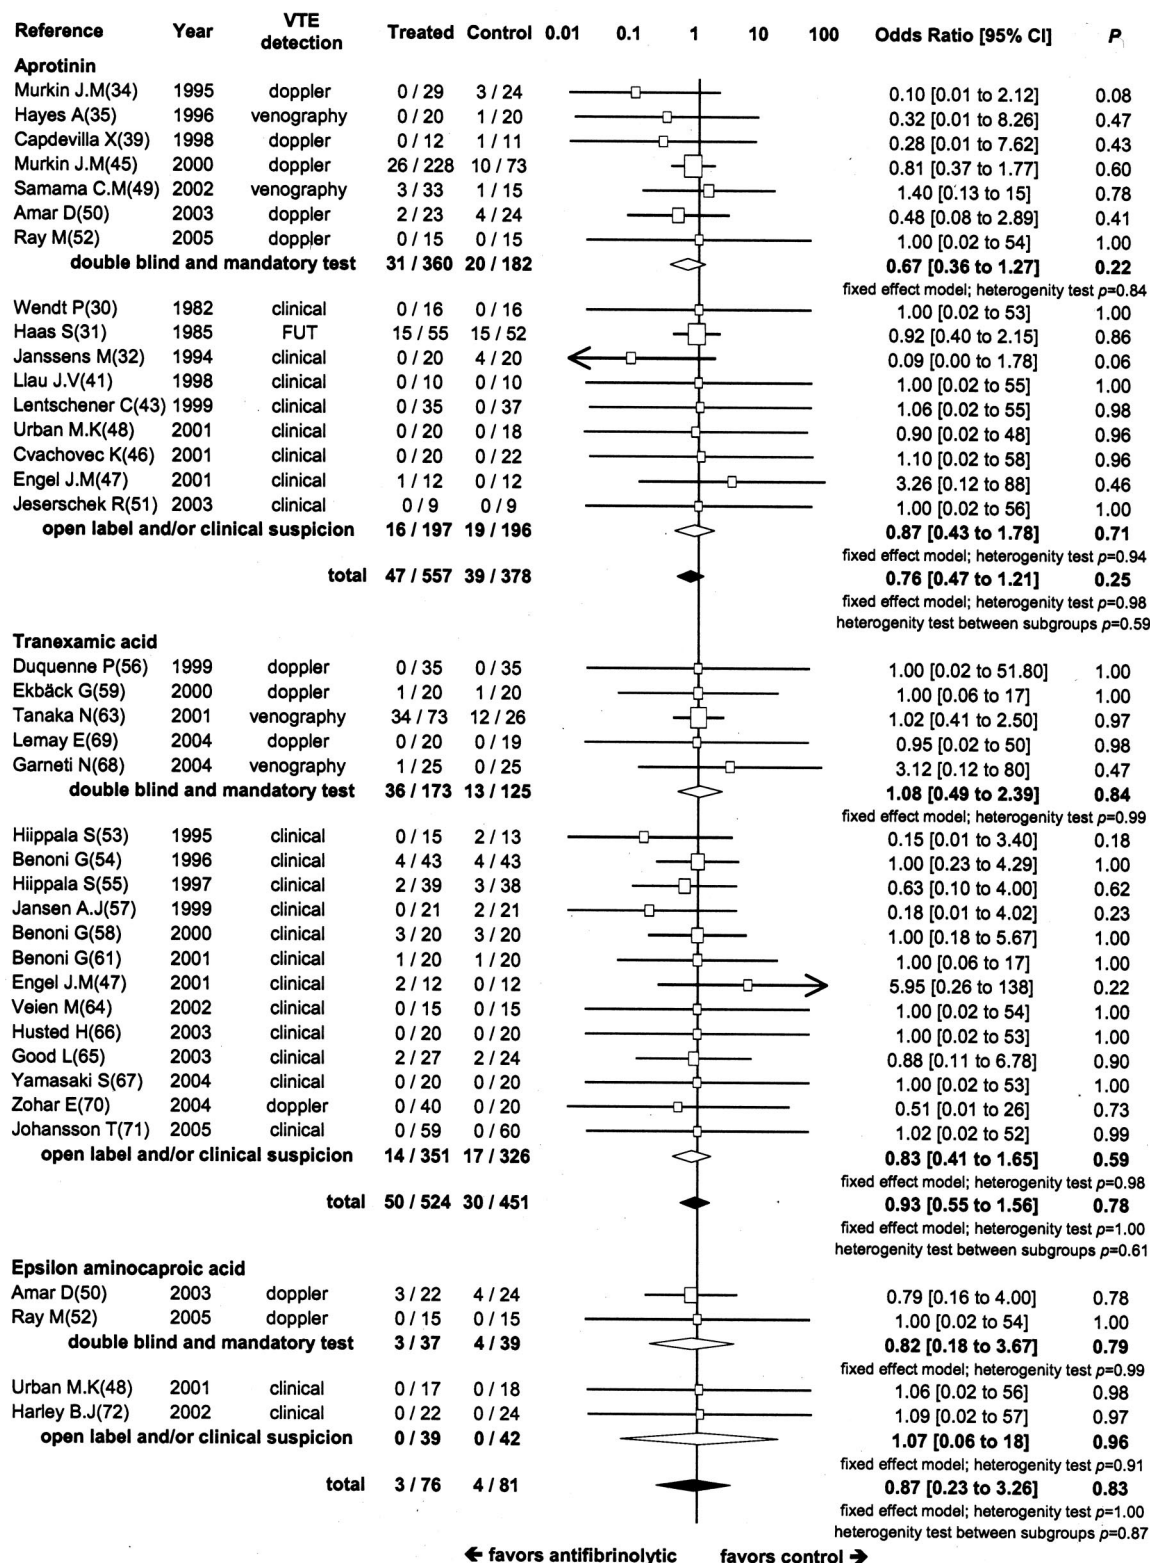

Fig. 5. Meta-analysis of use of antifibrinolytic compared with placebo or no treatment on venous thromboembolism. The odds ratio for the individual studies is represented as a square within a bar representing the 95% confidence interval (CI). Symbol size is proportional to the study weight. The odds ratio for summaries is represented as a diamond. The width of the diamonds corresponds to the 95% CI. An odds ratio greater than 1 indicates that the antifibrinolytic is at risk compared with placebo. If the value of 1 is included within the 95% CI, the result is not significant ( $P > 0.05$ ). FUT = fibrinogen uptake test; VTE = venous thromboembolism.

open-label and double-blind studies were pooled. This permitted exploratory analyses for additional assessment of the use of antifibrinolytics in orthopedic surgery.

The regimen of antifibrinolytics used varied from one study to another. Because the optimal regimen in orthopedics had not previously been defined in randomized control studies, we explored the efficacy of aprotinin or tranexamic acid according to different covariables. With tranexamic acid, results showed a significant reduction of erythrocyte transfusion requirement whatever the regimen used. However, the effect was greater with the higher dosage. The OR was 0.21 (0.14–0.33) with a total dose lower than 30 mg/kg and 0.08 (0.04–0.17) with the higher dose. This may explain the discrepancy of results between knee and hip arthroplasty (fig. 3). In this latter surgical setting, which showed a lower efficacy than in knee arthroplasty, only the lower dose of tranexamic acid was used. With aprotinin, the exploratory analyses did not find any influence of any covariable analyzed; in particular, there was no significant dose–effect relation. It is noteworthy that the regimens of aprotinin used in orthopedic surgery were based on those used in cardiac surgery, with a primary preoperative loading dose followed, in most cases, by a continuous infusion limited to the intraoperative period. In orthopedic surgery, time taken for individual patients to achieve physiologic hemostasis in the postoperative period is uncertain. Besides, continual intraoperative bleeding may be responsible for partial washout of antifibrinolytics because reinfusion is not done immediately after blood loss, as in cardiac bypass surgery. This could explain the results observed with tranexamic acid that seem to favor administration of more than one single bolus limited to the intraoperative period (fig. 3). However, because the trials were not randomized with respect to the dose administered, the duration of treatment, and the timings of first administration, our evaluation of the different regimen of antifibrinolytics is evidently tentative and must be confirmed in further well-designed trials.

The efficacy of antifibrinolytics according to the underlying transfusion rate has not yet been investigated in clinical settings that are characterized by varying baseline risks of blood loss or transfusion.<sup>7</sup> With this in mind, we performed a linear regression analysis. Results revealed a significant correlation between the transfusion rates in the antifibrinolytic and control groups (fig. 4). Although this linear regression is a *post hoc* analysis, it proposes an estimation of the efficacy of antifibrinolytics in different clinical settings and according to varying baseline risks of transfusion. Furthermore, this linear model is suggestive of a mixed-effects model, a combination of a multiplicative and additive model.<sup>9</sup> Therefore, the number needed to treat for aprotinin or tranexamic acid to avoid transfusing one patient varies according to the different transfusion rates in the control group. For example, our linear regression suggests that

with the use of tranexamic acid, the number needed to treat is five for a 20% transfusion rate in the control group and less than three for a 70% transfusion rate. We agree with Ho *et al.*<sup>76</sup> that tranexamic acid is likely to be more useful in the clinical setting of a high transfusion rate: The higher the transfusion rate is, the lower the number needed to treat (multiplicative model) is. However, the magnitude of efficacy may not be as variable as they previously suggested (additive model).<sup>76</sup>

There are several issues that must be addressed. Summarized data on transfusion of fresh frozen plasma or platelets in the individual trials were insufficiently reported to perform a meta-analysis. Therefore, the reduction in transfusion observed in our review is limited to erythrocyte transfusion and is not predictive for other allogeneic blood elements. The included trials did not compare the efficacy and cost of antifibrinolytics to other effective interventions designed to minimize allogeneic erythrocyte transfusion, such as preoperative autologous blood donation, perioperative cell salvage, or the use of erythropoietin.<sup>77,78</sup> Finally and more importantly, the safety of the use of antifibrinolytics remains a matter of concern. As previously suggested in cardiac surgery,<sup>7</sup> our review did not demonstrate a statistically significant excessive risk of thromboembolic events with the use of antifibrinolytics. However, great care should be taken regarding the safety results. Trials selected for our analysis were designed to assess efficacy but were inadequate for the detection of adverse events. The small sample size of the trials was not sufficient to detect relatively infrequent, but clinically serious, safety events such as arterial thrombosis, renal failure, or rhabdomyolysis.<sup>6</sup> Most studies lacked a prospective monitoring of safety outcomes, and due to enrollment criteria, patients at high risk of thromboembolic events, *e.g.*, patients with a history of ischemic heart disease, were often excluded. As a consequence, the reported rate of adverse events is underestimated in our review. For example, there were only 2 cases of myocardial infarction among 2,431 patients (0.08% [95% confidence interval, 0–0.2%]), a lower frequency than previously reported in orthopedic arthroplasty surgery (0.4%).<sup>79</sup> Besides, it seems that the different antifibrinolytics may not have the same frequency of serious adverse events.<sup>80</sup> The evaluation of venous thromboembolic events was less limited because several double-blind randomized trials prospectively and systematically assessed this endpoint with an objective test. Furthermore, the observed incidence of venous thrombosis was much higher than arterial thrombosis, allowing a more precise estimation (fig. 5). The lack of any significant excessive risk of venous thromboembolism with the use of antifibrinolytics could be due to the systematic use of venous thrombosis prophylaxis in these studies. Nevertheless, due to the wide confidence intervals of the summary estimate for venous thromboembolic events, this review cannot determine whether



the administration of these agents increases the incidence or severity of venous thrombosis. Therefore, no definite conclusions regarding venous thromboembolic events can be drawn from this review. Finally, there are concerns about the safety of aprotinin because it is a polypeptide derived from bovine lungs and possesses antigenic properties.<sup>6</sup> Among the 723 patients who received aprotinin in our analysis, 2 had a nonfatal anaphylactic reaction.<sup>49,50</sup>

In conclusion, this analysis suggests that the use of aprotinin and tranexamic acid in orthopedic surgery significantly reduces the risk of allogeneic erythrocyte transfusion. However, results were too scarce for the evaluation of safety. Therefore, no definite conclusions regarding the clinical benefit-risk ratio of the use of antifibrinolytics in orthopedic surgery can be derived from our review. Larger prospective trials are required to define the optimal regimen, to assess the safety and cost-effectiveness of antifibrinolytics before recommending their use in orthopedic surgery.

The authors thank Michel Cucherat, M.D., Ph.D. (EA3736, Laennec Faculty of Medicine, Lyon, France), for his advice and help in statistical analyses and Andreas Theodorou (Medical Writer, MediBridge SA, Vélizy, France) for the English translation. They are grateful to the following authors who confirmed or completed their data: David Amar, M.D., and Hao Zhang, M.D. (Department of Anesthesiology and Critical Care Medicine, Memorial Sloan-Kettering Cancer Center, New York, New York), Lauren Beaupré, P.T., Ph.D. (Division of Orthopedics, University of Alberta Hospital, Capital Health Regional Health Authority, Edmonton, Alberta, Canada), and Brian J. Harley, M.D., F.R.C.S.C. (Department of Orthopedic Surgery, SUNY Upstate Medical University, Syracuse, New York), Göran Benoni, M.D., Ph.D. (Department of Orthopedics, Malmö University Hospital, Malmö, Sweden), Xavier Capdevila, M.D., Ph.D. (Department of Anesthesiology and Critical Care Medicine, Lapeyronie University Hospital, Montpellier, France), Karel Cvachovec, M.D., C.Sc. (Department of Anesthesiology and Critical Care Medicine, Charles University, Second Faculty of Medicine, Motol University Hospital, Prague, Czech Republic), Pierre Duquenne, M.D. (Department of Anesthesiology, Centre Hospitalier Chrétien, Clinique St-Joseph, Liège, Belgium), Gustav Ekbläck, M.D. (Department of Anesthesiology and Intensive Care, Örebro University Hospital, Örebro, Sweden), Jörg Engel, M.D. (Department of Anesthesiology and Intensive Care Medicine, Justus-Liebig-University, Giessen, Germany), Narendra Garneti, M.Sc., M.R.C.S. (Specialist Registrar in Trauma and Orthopaedics, Yorkshire Deanery, Leeds, United Kingdom), Joanne Guay, M.D., F.R.C.P.C., and Eric Lemay, M.D., F.R.C.P.C. (Department of Anesthesiology, Maisonneuve-Rosemont Hospital, University of Montreal, Montreal, Quebec, Canada), Seppo Hiippala, M.D. (Department of Anesthesia and Intensive Care, Meilahti Hospital, Helsinki University, Helsinki, Finland), Torsten Johansson M.D., Ph.D. (Division of Orthopedics and Sports Medicine, Department of Neuroscience and Locomotion, Faculty of Health Sciences, University of Linköping, Linköping, Sweden), Claude Lentschener, M.D. (Department of Anesthesia and Critical Care, Hôpital Cochin, Paris, France), Björn Lisander, M.D., and Lars Good, M.D., Ph.D. (Department of Anesthesiology and Intensive Care and Division of Orthopedics and Sports Medicine, Department of Neuroscience and Locomotion, Faculty of Health Sciences, University of Linköping, Linköping, Sweden), John M. Murkin, M.D., F.R.C.P.C. (Department of Anesthesiology and Perioperative Medicine, University of Western Ontario, London, Ontario, Canada), Michael Ray, Ph.D. (Queensland Health Pathology Service, The Prince Charles Hospital, Brisbane, Australia), Stig Sonne-Holm, M.D., D.M.Sc., and Henrik Husted, M.D. (Department of Orthopaedic Surgery, Hvidovre University Hospital, Copenhagen, Denmark), Satoshi Yamasaki, M.D. (Department of Orthopedic Surgery, Osaka Kosei-Nenkin Hospital, Osaka, Japan), and Edna Zohar, M.D. (Department of Anesthesiology and Intensive Care, Meir Hospital, Kfar Saba, Israel).

## References

- Hill GE, Frawley WH, Griffith KE, Forestner JE, Minei JP: Allogeneic blood transfusion increases the risk of postoperative bacterial infection: A meta-analysis. *J Trauma* 2003; 54:908-14
- Spahn DR, Casutt M: Eliminating blood transfusions: New aspects and perspectives. *ANESTHESIOLOGY* 2000; 93:242-55
- Henry DA, Carless PA, Moxey AJ, O'Connell D, Forgie MA, Wells PS,

- Fergusson D: Pre-operative autologous donation for minimising perioperative allogeneic blood transfusion. *Cochrane Database Syst Rev* 2002; 2
- Carless PA, Henry DA, Moxey AJ, O'Connell DL, Fergusson DA: Cell salvage for minimising perioperative allogeneic blood transfusion. *Cochrane Database Syst Rev* 2003; 4
- Laupacis A, Fergusson D: Erythropoietin to minimize perioperative blood transfusion: A systematic review of randomized trials. *The International Study of Peri-operative Transfusion (ISPOT) Investigators. Transfus Med* 1998; 8:309-17
- Mannucci PM: Hemostatic drugs. *N Engl J Med* 1998; 339:245-53
- Henry DA, Moxey AJ, Carless PA, O'Connell D, McClelland B, Henderson KM, Sly K, Laupacis A, Fergusson D: Anti-fibrinolytic use for minimising perioperative allogeneic blood transfusion. *Cochrane Database Syst Rev* 2001; 1
- Sterne JA, Egger M, Smith GD: Systematic reviews in health care: Investigating and dealing with publication and other biases in meta-analysis. *BMJ* 2001; 323:101-5
- Boissel JP, Collet JP, Lieve M, Girard P: An effect model for the assessment of drug benefit: Example of antiarrhythmic drugs in postmyocardial infarction patients. *J Cardiovasc Pharmacol* 1993; 22:356-63
- Wollinsky KH, Mehrkens HH, Freytag T, Geiger P, Weindler M: Does aprotinin lessen intraoperative blood loss? *Anesthesiol Intensivmed Notfallmed Schmerzther* 1991; 26:208-10
- Ozay K, Dogu H, Aydy M, Azali G, Arkan Z: Aprotinin infusion during major orthopaedic surgery. *Br J Anaesth* 1995; 74 (suppl 1):61
- Akizuki S, Yasukawa Y, Takizawa T: A new method of hemostasis for cementless total knee arthroplasty. *Bull Hosp Jt Dis* 1997; 56:222-4
- Zohar E, Fredman B, Ellis M, Luban I, Stern A, Jedeikin R: A comparative study of the postoperative allogeneic blood-sparing effect of tranexamic acid versus acute normovolemic hemodilution after total knee replacement. *Anesth Analg* 1999; 89:1382-7
- Zohar E, Fredman B, Ellis MH, Ifrach N, Stern A, Jedeikin R: A comparative study of the postoperative allogeneic blood-sparing effects of tranexamic acid and of desmopressin after total knee replacement. *Transfusion* 2001; 41:1285-9
- Haas S, Ketterl R, Stemberger A, Wendt P, Fritzsche HM, Kienzle H, Lechner F, Blumel G: The effect of aprotinin on platelet function, blood coagulation and blood lactate level in total hip replacement: A double blind clinical trial. *Adv Exp Med Biol* 1984; 167:287-97
- Haas S: Aprotinin: A blood-saving substance. *Infus Ther Transfus Med* 2002; 29:151-5
- D'Ambrosio A, Borghi B, Damato A, D'Amato G, Antonacci D, Grossi P: Interactions between epidural analgesia and antifibrinolytics. *Anaesthesia* 1998; 53:57-8
- Benoni G, Lethagen S, Fredin H: The effect of tranexamic acid on local and plasma fibrinolysis during total knee arthroplasty. *Thromb Res* 1997; 85:195-206
- Krohn CD, Sorensen R, Lange JE, Riise R, Bjørnsen S, Brosstad F: Tranexamic acid given into the wound reduces postoperative blood loss by half in major orthopaedic surgery. *Eur J Surg Suppl* 2003; 588:57-61
- Neilpovitz DT, Murto K, Hall L, Barrowman NJ, Splinter WM: A randomized trial of tranexamic acid to reduce blood transfusion for scoliosis surgery. *Anesth Analg* 2001; 93:82-7
- Cole JW, Murray DJ, Snider RJ, Bassett GS, Bridwell KH, Lenke LG: Aprotinin reduces blood loss during spinal surgery in children. *Spine* 2003; 28:2482-5
- Haynes RJ: Aprotinin reduced blood loss in long-segment posterior spinal fusion. *J Bone Joint Surg Am* 2004; 86:1102
- Khoshhal K, Mukhtar I, Clark P, Jarvis J, Letts M, Splinter W: Efficacy of aprotinin in reducing blood loss in spinal fusion for idiopathic scoliosis. *J Pediatr Orthop* 2003; 23:661-4
- Florentino-Pineda I, Thompson GH, Poe-Kochert C, Huang RP, Haber LL, Blakemore LC: The effect of Amicar on perioperative blood loss in idiopathic scoliosis: The results of a prospective, randomized double-blind study. *Spine* 2004; 29:233-8
- Aguado Barrera OM, Milian Calleja D, Cordero Escobar I, Fleite Marrero E: Use of epsilon amino caproic acid for surgical correction of scoliosis in patients with Marfan syndrome. *Revista Mexicana de Anestesiología* 2003; 26:17-20
- Freick H, Reuter HD, Piontek R: Supplementary preoperative prevention of thromboembolism through the use of aprotinin in alloplastic hip joint prosthesis? *Med Welt* 1983; 34:614-9
- Fejer C, Mezofi M, Varga PP: Use of high-dose aprotinin during spinal surgery results in a reduction in both blood loss and the amount of blood transfused. *Br J Anaesth* 1998; 80 (suppl 1):80
- Tommassi RM, Granell M, Garcia-Aguado R, Petrini F, Grau F, Palanca JM, Martinelli G: Blood loss reduction with aprotinin during spinal instrumented surgery. *Br J Anaesth* 1998; 80 (suppl 1):80-1
- Kraft V, Opel R, Reineke H, Trepte C: Aprotinin as a foreign blood saving measure in knee and prosthetic operations. *Osteosynthese Int* 1999; 7:174-6
- Wendt P, Ketterl R, Haas S, Fritzsche HM, Kienzle H, Lechner F, Blumel G: Postoperative increase in lactate in total hip endoprosthesis operations: Effect of aprotinin. Results of a clinical double-blind study. *Med Welt* 1982; 33:475-9
- Haas S, Fritzsche HM, Ritter H, Lechner F, Blümel G: Is the risk of postoperative thrombosis increased after perioperative therapy with the plasmin inhibitor aprotinin? *Chirurgisches Forum* 1991 für experimentelle und klinische Forschung. Edited by Hartel W, Bager HG, Ungeheuer E. Berlin, Springer-Verlag, 1991, pp 371-4



32. Janssens M, Joris J, David JL, Lemaire R, Lamy M: High-dose aprotinin reduces blood loss in patients undergoing total hip replacement surgery. *ANESTHESIOLOGY* 1994; 80:23-9
33. Thorpe CM, Murphy WG, Logan M: Use of aprotinin in knee replacement surgery. *Br J Anaesth* 1994; 73:408-10
34. Murkin JM, Shannon NA, Bourne RB, Rorabeck CH, Cruickshank M, Wylie G: Aprotinin decreases blood loss in patients undergoing revision or bilateral total hip arthroplasty. *Anesth Analg* 1995; 80:343-8
35. Hayes A, Murphy DB, McCarroll M: The efficacy of single-dose aprotinin 2 million KIU in reducing blood loss and its impact on the incidence of deep venous thrombosis in patients undergoing total hip replacement surgery. *J Clin Anesth* 1996; 8:357-60
36. Llaui JV, Hoyas L, Higuera J, Ezpeleta J, Garcia-Polit J: Aprotinin reduces intraoperative bleeding during spinal arthrodesis interventions (letter). *Rev Esp Anestesiol Reanim* 1996; 43:118
37. Compostella FA, Marcante P, Marcante S, Dosso P: High dose aprotinin in elective total hip replacement surgery: effects on bleeding and renal function. *Br J Anaesth* 1997; 78 (suppl 1):66
38. Utada K, Matayoshi Y, Sumi C, Itaya M, Miyawaki H, Ito M, Tamura H, Mitsukuni T: Aprotinin 2 million KIU reduces perioperative blood loss in patients undergoing primary total hip replacement. *Masui* 1997; 46:77-82
39. Capdevila X, Calvet Y, Biboulet P, Biron C, Rubenovich J, d'Athis F: Aprotinin decreases blood loss and homologous transfusions in patients undergoing major orthopedic surgery. *ANESTHESIOLOGY* 1998; 88:50-7
40. Garcia-Enguita MA, Ortega JP, Gomez C, Rasal S, Pascual A, Urieta-Solanas A: High dose aprotinin in complex total hip arthroplasty. *Br J Anaesth* 1998; 80 (suppl 1):80
41. Llaui JV, Aguilar G, Soliveres J, Minguez MF, Saz T, Belda FJ: Aprotinin administration reduces blood loss and transfusion requirements in patients undergoing total hip arthroplasty. *Br J Anaesth* 1998; 80 (suppl 1):80
42. D'Ambrosio A, Borghi B, Damato A, D'Amato G, Antonacci D, Valeri F: Reducing perioperative blood loss in patients undergoing total hip arthroplasty. *Int J Artif Organs* 1999; 22:47-51
43. Lentschener C, Cottin P, Bouaziz H, Mercier FJ, Wolf M, Aljabi Y, Boyer-Neumann C, Benhamou D: Reduction of blood loss and transfusion requirement by aprotinin in posterior lumbar spine fusion. *Anesth Analg* 1999; 89:590-7
44. Langdown AJ, Field J, Grote J, Himayat H: Aprotinin (Trasylol) does not reduce bleeding in primary total hip arthroplasty. *J Arthroplasty* 2000; 15: 1009-12
45. Murkin JM, Haig GM, Beer KJ, Cicuttini N, McCutchen J, Comunale ME, Hall R, Ruzicka BB: Aprotinin decreases exposure to allogeneic blood during primary unilateral total hip replacement. *J Bone Joint Surg Am* 2000; 82:675-84
46. Cvachovec K, Sechovska H, Berousek J, Popelka S, Hladikova M: Aprotinin (Antilysin Spofa): Its effect on decreasing hemorrhage in the postoperative period in hip arthroplasty. *Acta Chir Orthop Traumatol Cech* 2001; 68:311-4
47. Engel JM, Hohaus T, Ruwoldt R, Menges T, Jurgensen I, Hempelmann G: Regional hemostatic status and blood requirements after total knee arthroplasty with and without tranexamic acid or aprotinin. *Anesth Analg* 2001; 92:775-80
48. Urban MK, Beckman J, Gordon M, Urquhart B, Boachie-Adjei O: The efficacy of antifibrinolytics in the reduction of blood loss during complex adult reconstructive spine surgery. *Spine* 2001; 26:1152-6
49. Samama CM, Langeron O, Rosencher N, Capdevila X, Rouche P, Pegoux M, Berniere J, Coriat P: Aprotinin *versus* placebo in major orthopedic surgery: A randomized, double-blinded, dose-ranging study. *Anesth Analg* 2002; 95:287-93
50. Amar D, Grant FM, Zhang H, Boland PJ, Leung DH, Healey JA: Antifibrinolytic therapy and perioperative blood loss in cancer patients undergoing major orthopedic surgery. *ANESTHESIOLOGY* 2003; 98:337-42
51. Jeserscheck R, Clar H, Aigner C, Rehak P, Primus B, Windhager R: Reduction of blood loss using high-dose aprotinin in major orthopaedic surgery: A prospective, double-blind, randomised and placebo-controlled study. *J Bone Joint Surg Br* 2003; 85:174-7
52. Ray M, Hatcher S, Whitehouse SL, Crawford S, Crawford R: Aprotinin and epsilon aminocaproic acid are effective in reducing blood loss after primary total hip arthroplasty: A prospective randomized double-blind placebo-controlled study. *J Thromb Haemost* 2005; 3:1421-7
53. Hiippala S, Strid L, Wennerstrand M, Arvela V, Mantyla S, Ylinen J, Niemela H: Tranexamic acid (Cyclokapron) reduces perioperative blood loss associated with total knee arthroplasty. *Br J Anaesth* 1995; 74:534-7
54. Benoni G, Fredin H: Fibrinolytic inhibition with tranexamic acid reduces blood loss and blood transfusion after knee arthroplasty: A prospective, randomised, double-blind study of 86 patients. *J Bone Joint Surg Br* 1996; 78:434-40
55. Hiippala ST, Strid LJ, Wennerstrand MI, Arvela JV, Niemela HM, Mantyla SK, Kuisma RP, Ylinen JE: Tranexamic acid radically decreases blood loss and transfusions associated with total knee arthroplasty. *Anesth Analg* 1997; 84: 839-44
56. Duquenne P, Lhoest L, Henkes W, De Sart F: Tranexamic acid reduces postoperative blood losses associated with elective total hip replacement. *J Bone Joint Surg Br* 1999; 81 (suppl 2):233
57. Jansen AJ, Andreica S, Claeys M, D'Haese J, Camu F, Jochmans K: Use of tranexamic acid for an effective blood conservation strategy after total knee arthroplasty. *Br J Anaesth* 1999; 83:596-601
58. Benoni G, Lethagen S, Nilsson P, Fredin H: Tranexamic acid, given at the end of the operation, does not reduce postoperative blood loss in hip arthroplasty. *Acta Orthop Scand* 2000; 71:250-4
59. Ekback G, Axelsson K, Rytberg L, Edlund B, Kjellberg J, Weckstrom J, Carlsson O, Schott U: Tranexamic acid reduces blood loss in total hip replacement surgery. *Anesth Analg* 2000; 91:1124-30
60. Ido K, Neo M, Asada Y, Kondo K, Morita T, Sakamoto T, Hayashi R, Kuriyama S: Reduction of blood loss using tranexamic acid in total knee and hip arthroplasties. *Arch Orthop Trauma Surg* 2000; 120:518-20
61. Benoni G, Fredin H, Knebel R, Nilsson P: Blood conservation with tranexamic acid in total hip arthroplasty: A randomized, double-blind study in 40 primary operations. *Acta Orthop Scand* 2001; 72:442-8
62. Ellis MH, Fredman B, Zohar E, Ifrach N, Jedeikin R: The effect of tourniquet application, tranexamic acid, and desmopressin on the procoagulant and fibrinolytic systems during total knee replacement. *J Clin Anesth* 2001; 13:509-13
63. Tanaka N, Sakahashi H, Sato E, Hirose K, Ishima T, Ishii S: Timing of the administration of tranexamic acid for maximum reduction in blood loss in arthroplasty of the knee. *J Bone Joint Surg Br* 2001; 83:702-5
64. Veien M, Sorensen JV, Madsen F, Juelsgaard P: Tranexamic acid given intraoperatively reduces blood loss after total knee replacement: A randomized, controlled study. *Acta Anaesthesiol Scand* 2002; 46:1206-11
65. Good L, Peterson E, Lisander B: Tranexamic acid decreases external blood loss but not hidden blood loss in total knee replacement. *Br J Anaesth* 2003; 90:596-9
66. Husted H, Blond L, Sonne-Holm S, Holm G, Jacobsen TW, Gebuhr P: Tranexamic acid reduces blood loss and blood transfusions in primary total hip arthroplasty: A prospective randomized double-blind study in 40 patients. *Acta Orthop Scand* 2003; 74:665-9
67. Yamasaki S, Masuhara K, Fuji T: Tranexamic acid reduces blood loss after cementless total hip arthroplasty: Prospective randomized study in 40 cases. *Int Orthop* 2004; 28:69-73
68. Garneti N, Field J: Bone bleeding during total hip arthroplasty after administration of tranexamic acid. *J Arthroplasty* 2004; 19:488-92
69. Lemay E, Guay J, Cote C, Roy A: Tranexamic acid reduces the need for allogeneic red blood cell transfusions in patients undergoing total hip replacement. *Can J Anaesth* 2004; 51:31-7
70. Zohar E, Ellis M, Ifrach N, Stern A, Sapir O, Fredman B: The postoperative blood-sparing efficacy of oral *versus* intravenous tranexamic acid after total knee replacement. *Anesth Analg* 2004; 99:1679-83
71. Johansson T, Pettersson L-G, Lisander B: Tranexamic acid in total hip arthroplasty saves blood and money. *Acta Orthop Scand* 2005; 76:314-9
72. Harley BJ, Beaupre LA, Jones CA, Cinats JG, Guenther CR: The effect of epsilon aminocaproic acid on blood loss in patients who undergo primary total hip replacement: A pilot study. *Can J Surg* 2002; 45:185-90
73. Lentschener C, Roche K, Ozier Y: A review of aprotinin in orthotopic liver transplantation: Can its harmful effects offset its beneficial effects? *Anesth Analg* 2005; 100:1248-55
74. Boylan JF, Klinck JR, Sandler AN, Arellano R, Greig PD, Nierenberg H, Roger SL, Glynn MF: Tranexamic acid reduces blood loss, transfusion requirements, and coagulation factor use in primary orthotopic liver transplantation. *ANESTHESIOLOGY* 1996; 85:1043-8
75. Juni P, Altman DG, Egger M: Systematic reviews in health care: Assessing the quality of controlled clinical trials. *BMJ* 2001; 323:42-6
76. Ho KM, Ismail H: Use of intravenous tranexamic acid to reduce allogeneic blood transfusion in total hip and knee arthroplasty: A meta-analysis. *Anaesth Intensive Care* 2003; 31:529-37
77. Coyle D, Lee KM, Fergusson DA, Laupacis A: Economic analysis of erythropoietin use in orthopaedic surgery. *Transfus Med* 1999; 9:21-30
78. Sonnenberg FA, Gregory P, Yomtovian R, Russell LB, Tierney W, Kosmin M, Carson JL: The cost-effectiveness of autologous transfusion revisited: Implications of an increased risk of bacterial infection with allogeneic transfusion. *Transfusion* 1999; 39:808-17
79. Mantilla CB, Horlocker TT, Schroeder DR, Berry DJ, Brown DL: Frequency of myocardial infarction, pulmonary embolism, deep venous thrombosis, and death following primary hip or knee arthroplasty. *ANESTHESIOLOGY* 2002; 96: 1140-6
80. Mangano DT, Tudor IC, Dietzel C, Multicenter Study of Perioperative Ischemia Research Group, Ischemia Research and Education Foundation: The risk associated with aprotinin in cardiac surgery. *N Engl J Med* 2006; 354: 353-65
